# Supplementary material for: Biocompatible fluorescent europium(iii) magnetic nanoparticles
Source: Royal Society of Chemistry journal article supplement (doi:10.1039/d3nj04897g), 2023-01-01
Supplement: d3nj04897g1.pdf [file d3nj04897g1.pdf]

## Biocompatible Fluorescent Europium (III) Magnetic Nanoparticles

### *Supplemental Information*

**Inês J. Marques<sup>a</sup>, Pedro D. Vaz<sup>b</sup>, Ana V. Girão<sup>d</sup>, Mariela M. Nolasco<sup>c</sup>, Carla D. Nunes<sup>a\*</sup>**

<sup>a</sup> Institute of Molecular Sciences, Centro de Química Estrutural – FCUL, Departamento de Química e Bioquímica, Faculdade de Ciências da Universidade de Lisboa, 1749-016 Lisboa, Portugal.

<sup>b</sup> Champalimaud Centre for the Unknown, Champalimaud Foundation, Av. Brasília, 1400-038 Lisboa, Portugal.

<sup>c</sup> Chemistry Department and CICECO, University of Aveiro, 3810-193 Aveiro, Portugal.

\* Correspondence to:

Dr. Carla D. Nunes

Institute of Molecular Sciences, Centro de Química Estrutural – FCUL, Departamento de Química e Bioquímica, Faculdade de Ciências da Universidade de Lisboa, 1749-016 Lisboa, Portugal

E-mail: [cmnunes@fc.ul.pt](mailto:cmnunes@fc.ul.pt)

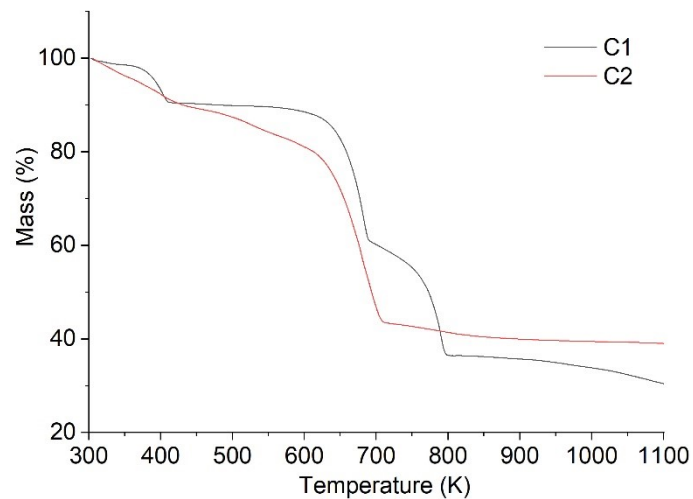

**Figure S1.** Thermogravimetric analysis (TGA) of **C1** and **C2** Eu complexes.

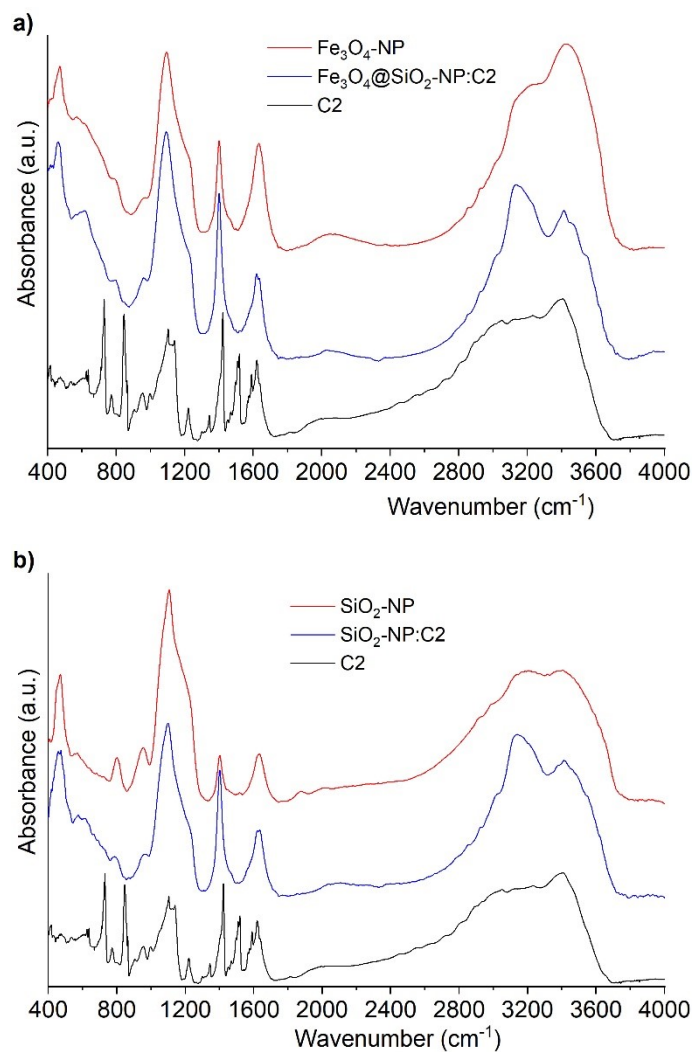

**Figure S2.** FTIR spectra of Si-NP (a) and Fe@Si-NP (b) nanomaterials in the 400-4000  $\text{cm}^{-1}$  range. For the sake of comparison, the Eu complex spectrum was also included.

**Table S1:** Particle size distribution obtained from DLS measurements and  $\zeta$  potential values in water at pH 7.

| <b>Parameter</b>           | <b>SiO<sub>2</sub>-NP</b> | <b>SiO<sub>2</sub>-NP:C2</b> | <b>Fe<sub>3</sub>O<sub>4</sub>@SiO<sub>2</sub>-NP</b> | <b>Fe<sub>3</sub>O<sub>4</sub>@SiO<sub>2</sub>-NP:C2</b> |
|----------------------------|---------------------------|------------------------------|-------------------------------------------------------|----------------------------------------------------------|
| Diameter <sup>a</sup> (nm) | 72.95                     | 76.81                        | 84.80                                                 | 91.28                                                    |
| Std Dev. (nm)              | 14.40 (19.74%)            | 9.26 (12.06%)                | 14.04 (16.56%)                                        | 15.42 (16.89%)                                           |
| $\zeta$ (mV)               | -40.64                    | 46.31                        | -38.91                                                | 43.17                                                    |
| Std Dev. (mV)              | 0.59 (1.45%)              | 1.16 (2.50%)                 | 0.91 (2.34%)                                          | 1.19 (2.76%)                                             |

<sup>a</sup> Values presented refer to the number distribution data for easier comparison with results from electron microscopy.

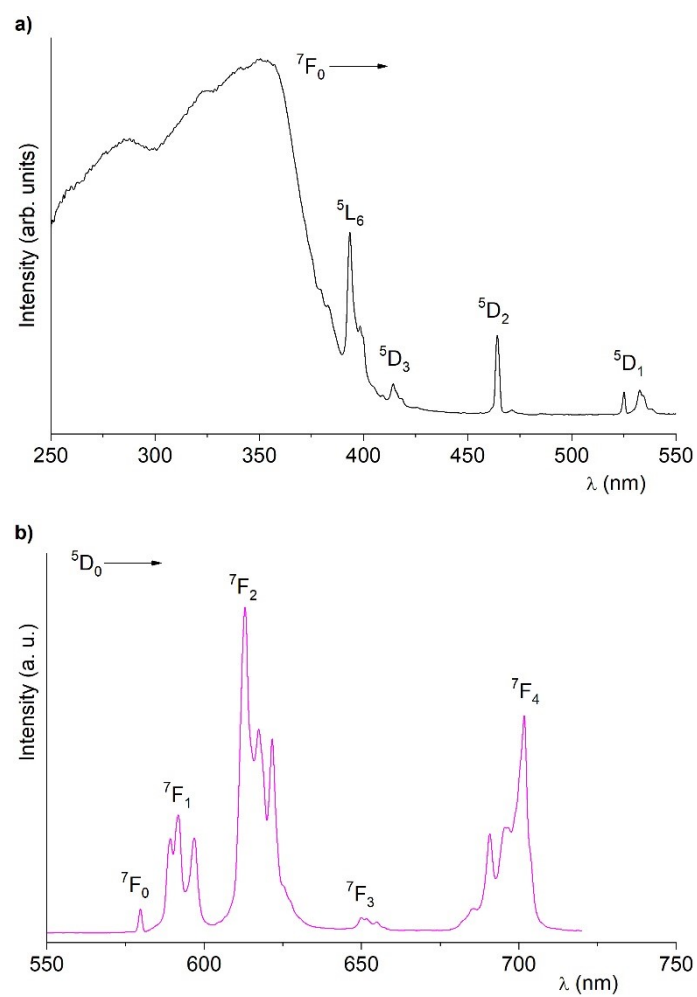

**Figure S3.** Excitation spectrum monitored at 612 nm (a) and emission spectrum with excitation at 355 nm (b) of Eu complex **C2**.

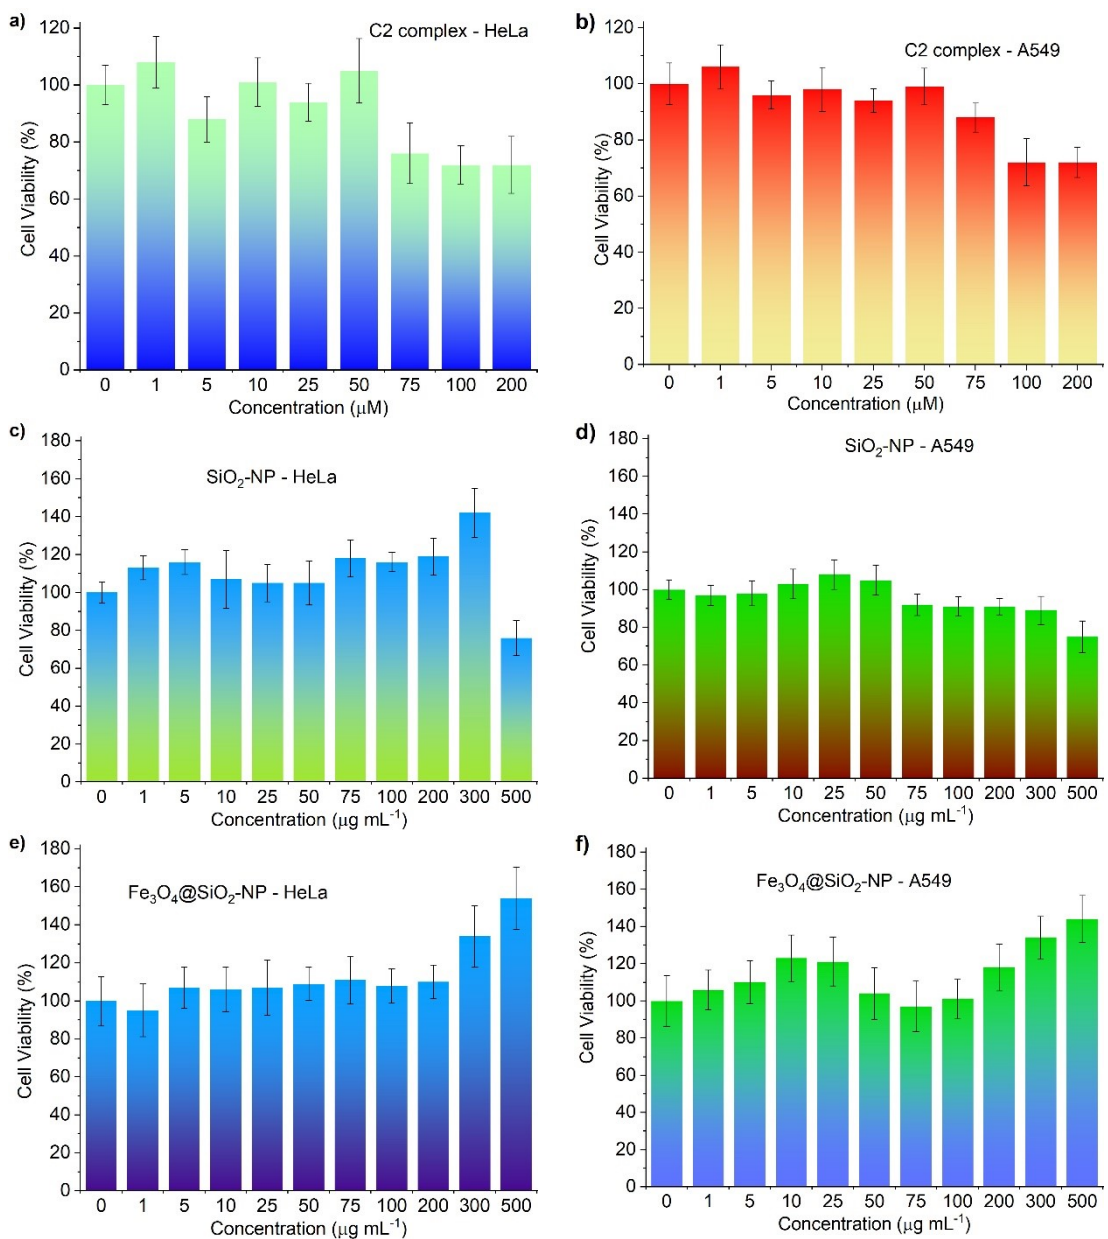

**Figure S4.** Cell viability tests of Eu complex **C2**, SiO<sub>2</sub>-NP and Fe<sub>3</sub>O<sub>4</sub>@SiO<sub>2</sub>-NP on HeLa (cervical cancer) and A549 (adenocarcinoma human alveolar basal epithelial cells) cell lines.
